# Supplementary material
Source: HighWire-hosted journal article supplement (https://bmjopen.bmj.com/content/14/12/e083234)
Supplement: inline-supplementary-material-2 [file inline-supplementary-material-2.pdf]

## Online Supplemental Appendix 2

## Purpose-built data extraction sheet

|                                                                                                                                                                                                                                                                                                                                                                                                                                                         |
|---------------------------------------------------------------------------------------------------------------------------------------------------------------------------------------------------------------------------------------------------------------------------------------------------------------------------------------------------------------------------------------------------------------------------------------------------------|
| <b>Source of evidence</b> (Authors, year)                                                                                                                                                                                                                                                                                                                                                                                                               |
| <b>Country</b>                                                                                                                                                                                                                                                                                                                                                                                                                                          |
| <b>Methodology:</b> qualitative, quantitative, or mixed methods                                                                                                                                                                                                                                                                                                                                                                                         |
| <b>Design:</b> cross-sectional, longitudinal, quasi-experimental, or experimental                                                                                                                                                                                                                                                                                                                                                                       |
| <b>Sample</b><br><br>Age: Sample mean age and/or age range (years)<br><br>Biological sex: Percentage of female<br><br>Race/ethnicity: Percentage of White<br><br>Health status and/or setting                                                                                                                                                                                                                                                           |
| <b>Theory:</b> Name of the theory (if any)                                                                                                                                                                                                                                                                                                                                                                                                              |
| <b>Concept of concerns about falling</b><br><br>Facet measured: Fear of falling or fall efficacy<br><br>Measurement instrument used: Name of the instrument (if any)                                                                                                                                                                                                                                                                                    |
| <b>Concept of physical activity</b><br><br>Domain or type of physical activity measured: Leisure-time physical activity, work- or school-related activity, household, domestic, or self-care activities, activity for transport from place to place.<br><br>Characteristics of physical activity: Frequency, Intensity, Mode<br><br>Mode of assessment: Self-report or device-based<br><br>Measurement instrument used: Name of the instrument (if any) |
| <b>Main findings pertaining to the relationship between concerns about falling and physical</b>                                                                                                                                                                                                                                                                                                                                                         |

| activity                                                                                                                                                                |
|-------------------------------------------------------------------------------------------------------------------------------------------------------------------------|
| <b>Moderation investigation:</b><br><br>Yes/no<br><br>Theoretical rationale for the investigation and hypotheses (if any)<br><br>Main findings pertaining to moderation |
